# Supplementary material for: Carfilzomib modulates tumor microenvironment to potentiate immune checkpoint therapy for cancer
Source: PubMed Central journal article supplement (PMC8749493; doi:10.15252/emmm.202114502), 2021-12-13
Supplement: EMMM-14-e14502-s005.pdf [file EMMM-14-e14502-s005.pdf]

|                                           |           |
|-------------------------------------------|-----------|
| Appendix Figure S1                        | Page 1    |
| Appendix Figure S1-Figure legends         | Page 2-3  |
| Appendix Figure S2                        | Page 4    |
| Appendix Figure S2-Figure legends         | Page 5    |
| Appendix Figure S3                        | Page 6    |
| Appendix Figure S3-Figure legends         | Page 7    |
| Appendix Table S1: Antibody dilution list | Page 8    |
| Appendix Table S2: p-Value                | Page 9-16 |

# Appendix Figure S1

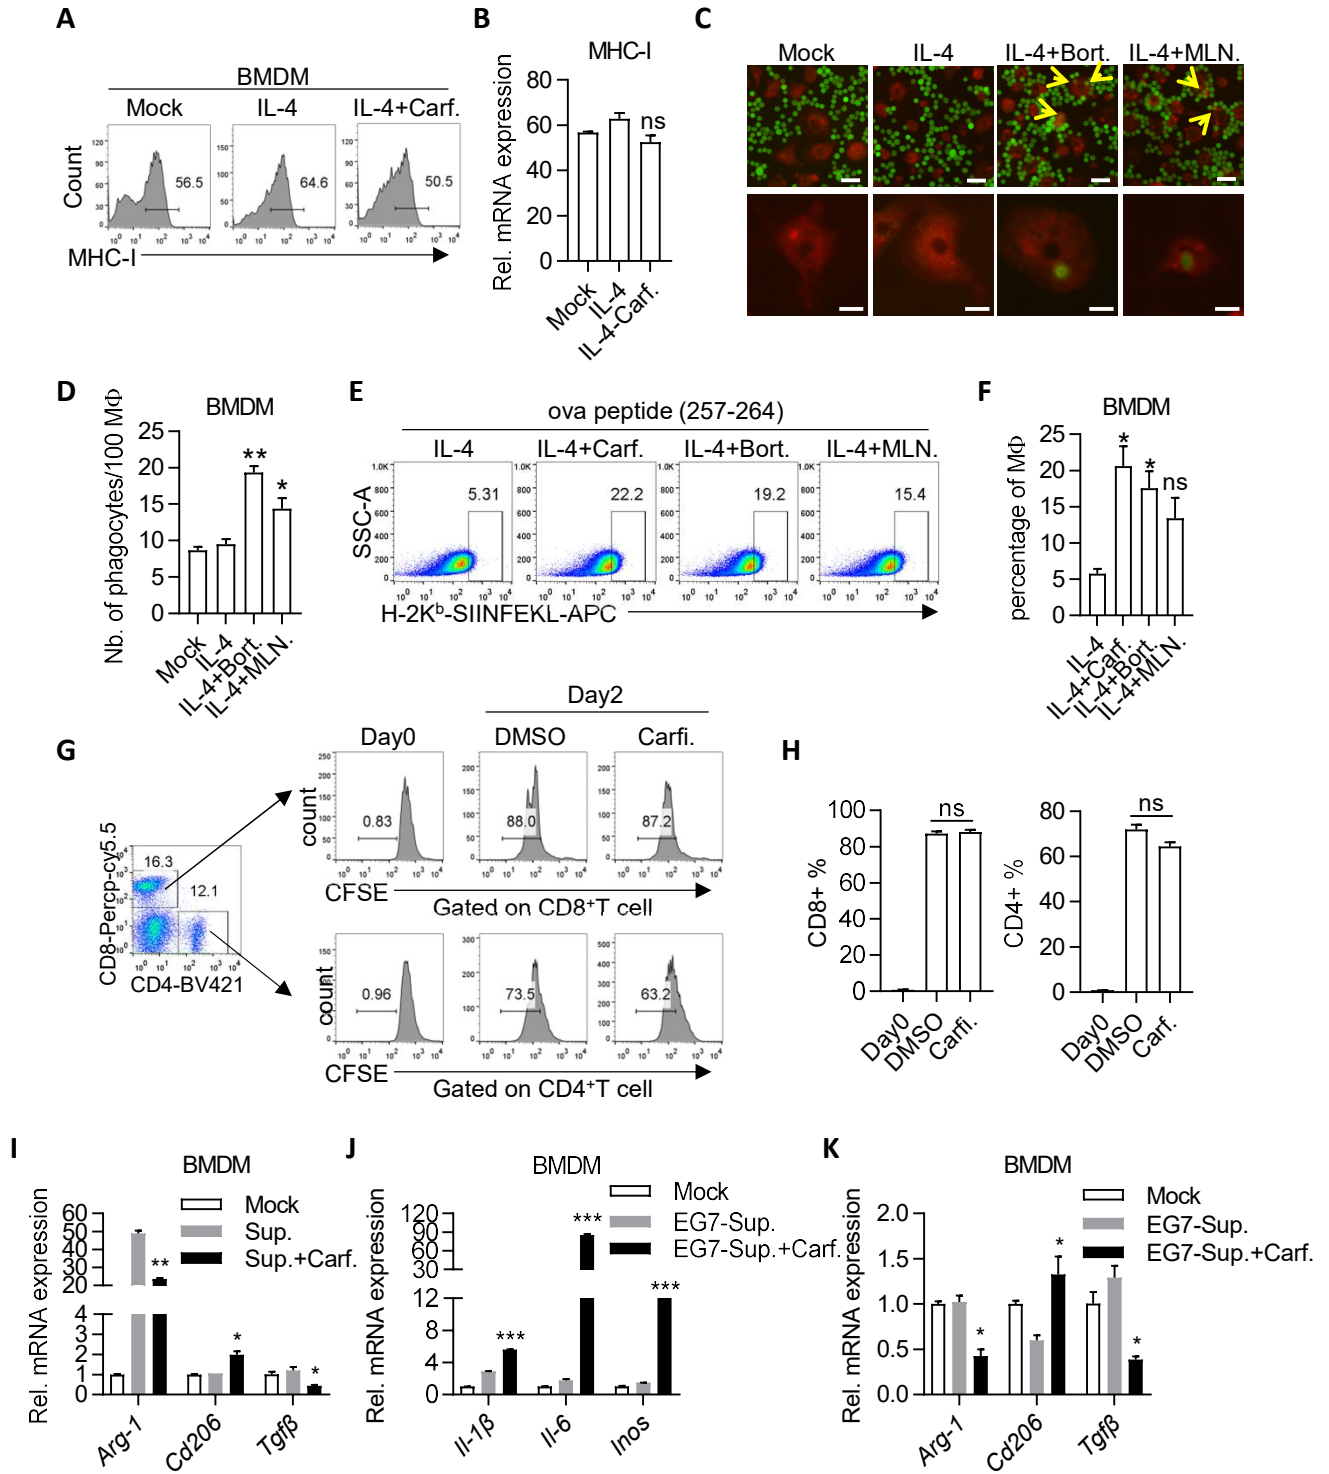

**Appendix Figure S1. Carfilzomib, Bortezomib and MLN9708 reprogram M2 macrophages into M1-like population**

A, B. Carfilzomib can not promote the expression of MHC-I in BMDMs. BMDMs were treated as described in Figure 2C, and the representative histogram of MHC-I expression was shown by flow cytometry 12 hours after stimulation (A). Statistics represent the proportion of MHC-I positive cells in BMDMs (B). The MHC-I<sup>+</sup> population according to isotype-matched antibody staining control.

C, D. Bortezomib and MLN9708 promote the phagocytic ability of macrophages. BMDMs were pretreated by IL-4 (20 ng/mL) for 24 hours, then stimulated by DMSO, Bortezomib (500 nM) or MLN9708 (500 nM) for 12 hours. After starving for 2 hours and stained with Deep Red membrane dye, BMDMs (red) were incubated with L1210-GFP cells (green) as targets in serum-free medium for another 2 hours. Phagocytosis effect was observed and photographed under fluorescence microscope (C). Statistics for the amount of phagocytosis of L1210 in 100 macrophages (D). Scale bars, 50  $\mu$ m (up), 20  $\mu$ m (down). The yellow arrows indicated L1210 that is phagocytosed by macrophages.

E, F. Carfilzomib, Bortezomib and MLN9708 promote the capacity of antigen presentation in macrophages. BMDMs were pretreated by IL-4 (20 ng/mL) for 24 hours, then stimulated by DMSO, Carfilzomib (500 nM), Bortezomib (500 nM) or MLN9708 (500 nM) for 12 hours. OVA<sub>257-264</sub> peptides were then transfected into BMDMs and the complex of H-2K<sup>b</sup>-SIINFEKL was detected by flow cytometry with antibody 25-D1.16.(E). Statistics represent the percentage of H-2K<sup>b</sup>-SIINFEKL positive cells in BMDMs (F).

G, H. Carfilzomib have no direct effect on the proliferation of CD4 and CD8 T cells. Splenocytes from B6 mice were induced by anti-CD3 and anti-CD28, and treated by DMSO or Carfilzomib (500 nM) for 2 days at the same time. CFSE was detected through flow cytometry after 2 days (G). Statistics represent and the intensity of CFSE and reflect the proliferation of T cells (H).

I. Carfilzomib suppresses the M2-polarization of macrophages acclimated by TSN of L1210. After taming to TAMs with TSN of L1210 cells, BMDMs were stimulated by DMSO or Carfilzomib (1  $\mu$ M). RNA was extracted from cells and the expression of *Arg-1*, *Tgf- $\beta$* , *Cd206* were quantified through RT-qPCR 6 hours after stimulation.

J, K. Carfilzomib promotes the M1-polarization and suppresses the M2-polarization of macrophages acclimated by TSN of EG7. After taming to TAMs with tumor culture supernatant (TSN) produced by EG7 cells, BMDMs were stimulated by DMSO or Carfilzomib (1  $\mu$ M). RNA was extracted from cells and the expression of *Il-1 $\beta$* , *Il-6*, *Inos*, *Arg-1*, *Tgf- $\beta$* , *Cd206* were quantified through RT-qPCR 6 hours after stimulation.

Data information: Data from three experiments are presented as the mean  $\pm$  SD. T test was used for statistical analysis of differences between groups. \* $p < 0.05$ , \*\* $p < 0.01$ , \*\*\* $p < 0.001$  (student's t-test).

# Appendix Figure S2

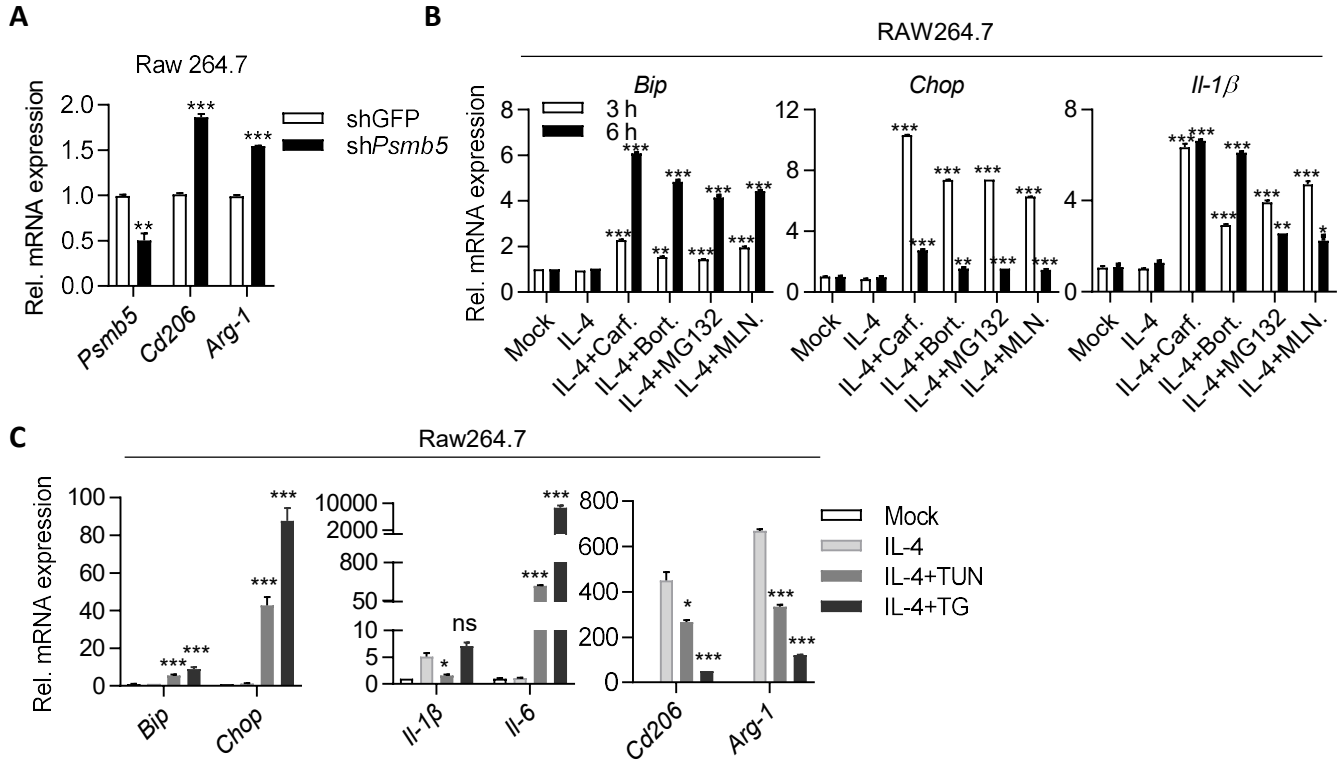

**Appendix Figure S2. Proteasomal inhibitors reprogram M2 macrophages toward M1-like macrophages by inducing ER stress signaling**

- A. Expression of M2 macrophage markers in IL-4 activated Raw264.7 with  $\beta 5$  subunit of proteasome knockdown. Raw264.7(shGFP or sh*Psm5*) was activated with IL-4 (20 ng/mL) for 24 hours. RNA was extracted and expression of *Cd206*, *Arg-1* were quantified through RT-qPCR.
- B. Carfilzomib, Bortezomib, MLN9708 and MG132 induce ER stress response and *Il-1 $\beta$*  in Raw264.7. Raw264.7 cells were pretreated with IL-4 (20 ng/mL) for 24 hours and then stimulated by DMSO, Carfilzomib (1  $\mu$ M), Bortezomib (1  $\mu$ M), MLN9708 (2  $\mu$ M) or MG132 (5  $\mu$ M) for 3 or 6 hours. RNA was extracted for quantifying expression of ER stress related genes (*Bip*, *Chop*) and *Il-1 $\beta$*  through RT-qPCR.
- C. TUN and TG promote the expression of M1 macrophage markers and ER stress related genes and reduce the expression of M2 macrophage markers in Raw264.7. Raw264.7 cells were pretreated with IL-4 (20 ng/mL) for 24 hours and then stimulated by DMSO, TUN (500 nM) or TG (500 nM) for 6 hours. RNA was extracted for quantifying expression of *Bip*, *Chop*, *Il-1 $\beta$* , *Il-6*, *Cd206* and *Arg1* through RT-qPCR.

Data information: Data from three experiments are presented as the mean  $\pm$  SD. T test was used for statistical analysis of differences between groups. \* $p < 0.05$ , \*\* $p < 0.01$ , \*\*\* $p < 0.001$  (student's t-test).

# Appendix Figure S3

PBMC Gating strategy

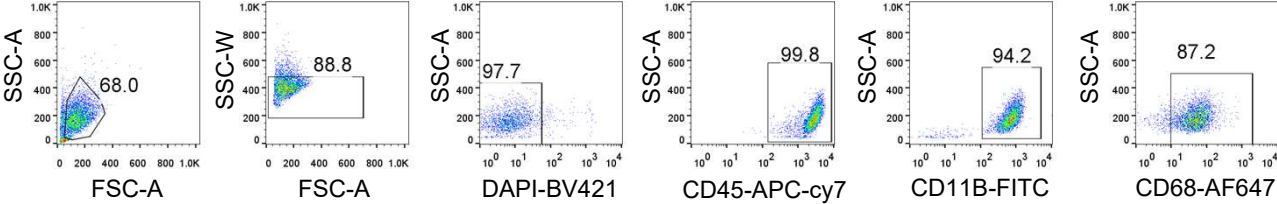

**Appendix Figure S3. Proteasome inhibitors are capable of reprogramming human M2 macrophages into M1-like macrophages**

Gating strategy for analyzing the expression of CD80 or CD206 in macrophages derived from PBMCs. After gating the single (by FSC-A and SSC-W) and living cells (DAPI negative), CD80 or CD206 positive cells were analyzed by gating on CD45<sup>+</sup>CD11B<sup>+</sup>CD68<sup>+</sup> population.



Appendix Table S1: Antibody dilution list

| Antibody                                   | Company        | Catalog Number | Dilution |
|--------------------------------------------|----------------|----------------|----------|
| CD45-FITC anti-mouse                       | BioLegend      | 103108         | 1/100    |
| CD45-APC anti-mouse                        | BD Biosciences | 559664         | 1/100    |
| CD45.1-FITC anti-mouse                     | Biolegend      | 110705         | 1/100    |
| CD45.2-APC anti-mouse                      | Biolegend      | 109813         | 1/100    |
| CD11B-APC anti-mouse                       | eBioscience    | 17-0112-81     | 1/100    |
| F4/80-BV650 anti-mouse                     | BD Biosciences | 743280         | 1/100    |
| CD80-PE anti-mouse                         | Biolegend      | 104707         | 1/100    |
| CD86-PE anti-mouse                         | Biolegend      | 105007         | 1/100    |
| CD206-PE anti-mouse                        | eBioscience    | 12-2061-80     | 1/100    |
| MHCI-FITC anti-mouse                       | eBioscience    | 11-5958-80     | 1/100    |
| MHCII-BV421- anti-mouse                    | BD Biosciences | 562928         | 1/100    |
| CD3e- APC-cy <sup>TM</sup> 7 anti-mouse    | BD Biosciences | 557596         | 1/100    |
| CD8a-PerCP-Cyanin5.5 anti-mouse            | eBioscience    | 45-0081-82     | 1/100    |
| CD4- PerCP-Cyanin5.5 anti-mouse            | BioLegend      | 100433         | 1/100    |
| CD69-PE anti-mouse                         | BioLegend      | 104507         | 1/50     |
| CD25-APC anti-mouse                        | eBioscience    | 17-0251-82     | 1/50     |
| H-2K <sup>b</sup> -SIINFEKL-APC anti-mouse | BioLegend      | 141606         | 1/100    |
| CD45- APC-cy <sup>TM</sup> 7 anti-human    | BD Biosciences | 557833         | 1/100    |
| CD11B-FITC anti-human                      | BD Biosciences | 557396         | 1/100    |
| CD68-AF647-anti-human                      | BD Biosciences | 562111         | 1/100    |
| CD80-BV605-anti-human                      | BD Biosciences | 563315         | 1/100    |
| CD206-PE anti-human                        | BD Biosciences | 555954         | 1/100    |
| Anti-mouse CD28                            | eBiocience     | 16-0281-82     | 1 µg/mL  |
| Anti-mouse CD3e                            | eBiocience     | 16-0031-85     | 2 µg/mL  |
| Anti-mouse PD-1                            | BioXcell       | BP0033-2       | 10 mg/kg |
| Anti-mouse CD8a                            | BioXcell       | BE0061         | 10 mg/kg |
| Anti-mouse CD4                             | BioXcell       | BP0003-3       | 10 mg/kg |
| Ki-67                                      | Abcam          | ab15580        | 1/500    |
| β-Actin                                    | Sigma-Aldrich  | A5316          | 1/5000   |
| IRE1 alpha                                 | CST            | 3294S          | 1/1000   |
| p-IRE1 alpha                               | Abcam          | ab226974       | 1/1000   |
| IκB alpha                                  | Abcam          | ab32518        | 1/1000   |
| p-IκB alpha                                | Abcam          | ab133462       | 1/1000   |
| P65                                        | Abcam          | ab16502        | 1/1000   |
| p-P65                                      | Abcam          | ab86299        | 1/1000   |
| TRAF2                                      | CST            | 4724S          | 1/1000   |
| Anti-mouse IgG                             | Sigma-Aldrich  | A0168          | 1/2000   |
| Anti-Rabbit IgG                            | Sigma-Aldrich  | A6154          | 1/2000   |
| Anti-Rabbit IgG (Light-Chain specific)     | CST            | 93702S         | 1/1000   |
| Anti-Rabbit IgG Isotype Control            | CST            | 3900S          | 1/1000   |

Appendix Table S2: p-Value

|                                |          |                  |
|--------------------------------|----------|------------------|
| Figure 1F                      | p-Value  | Test             |
| IL-4+Carf./IL-4                | 0.0007   | student's t-test |
| IL-4+Bort./IL-4                | 0.0003   | student's t-test |
| IL-4+MLN./IL-4                 | <0.0001  | student's t-test |
| Figure 1G                      | p-Value  | Test             |
| IL-4+Carf./IL-4                | <0.0001  | student's t-test |
| IL-4+Bort./IL-4                | <0.0001  | student's t-test |
| IL-4+MLN./IL-4                 | <0.0001  | student's t-test |
| Figure 1H                      | p-Value  | Test             |
| IL-4+Carf./IL-4                | 0.0015   | student's t-test |
| IL-4+Bort./IL-4                | 0.0032   | student's t-test |
| IL-4+MLN./IL-4                 | 0.0094   | student's t-test |
| Figure 1I                      | p-Value  | Test             |
| IL-4+Carf./IL-4                | 0.0001   | student's t-test |
| IL-4+Bort./IL-4                | 0.0002   | student's t-test |
| IL-4+MLN./IL-4                 | 0.0004   | student's t-test |
| Figure 2A                      | p-Value  | Test             |
| Il-6 (IL-4+Carf./IL-4)         | 0.0002   | student's t-test |
| Inos (IL-4+Carf./IL-4)         | <0.0001  | student's t-test |
| Cd206 (IL-4+Carf./IL-4)        | 0.0003   | student's t-test |
| Arg1 (IL-4+Carf./IL-4)         | 0.0007   | student's t-test |
| Figure 2B                      | p-Value  | Test             |
| IL-6 (IL-4+Carf./IL-4)         | <0.0001  |                  |
| TNF $\alpha$ (IL-4+Carf./IL-4) | 0.0037   |                  |
| Figure 2D                      | p-Value  | Test             |
| CD86 (IL-4+Carf./IL-4)         | 0.0167   | student's t-test |
| CD80 (IL-4+Carf./IL-4)         | 0.0043   | student's t-test |
| MHC-II (IL-4+Carf./IL-4)       | 0.0082   | student's t-test |
| Cd206 (IL-4+Carf./IL-4)        | 0.0089   | student's t-test |
| Figure 2F                      | p-Value  | Test             |
| IL-4+Carf./IL-4                | 0.01     | student's t-test |
| Figure 2H                      | p-Value  | Test             |
| IL-4+Carf./IL-4                | 0.0075   | student's t-test |
| Figure 2J                      | p-Value  | Test             |
| IL-4+Carf./IL-4                | 0.0167   | student's t-test |
| Figure 2L                      | p-Value  | Test             |
| IL-4+Carf./IL-4                | 0.0495   | student's t-test |
| Figure 2M                      | p-Value  | Test             |
| Il-1 $\beta$ (Sup.+Carf./Sup.) | 0.0029   | student's t-test |
| Il-6 (Sup.+Carf./Sup.)         | P<0.0001 | student's t-test |
| Inos (Sup.+Carf./Sup.)         | P<0.0001 | student's t-test |
| Figure 3A                      | p-Value  | Test             |
| IL-4+Carf./IL-4                | P<0.0001 | student's t-test |
| IL-4+MG132/IL-4                | 0.0024   | student's t-test |
| Figure 3B                      | p-Value  | Test             |
| Carf.+IL-4/IL-4                | 0.0149   | student's t-test |
| MG132+IL-4/IL-4                | 0.0093   | student's t-test |
| Figure 3C                      | p-Value  | Test             |
| Il-1 $\beta$ (IL-4+MG132/IL-4) | P<0.0001 | student's t-test |
| Il-6 (IL-4+MG132/IL-4)         | 0.0007   | student's t-test |
| Inos (IL-4+MG132/IL-4)         | P<0.0001 | student's t-test |
| Cd206 (IL-4+MG132/IL-4)        | 0.0123   | student's t-test |
| Arg1 (IL-4+MG132/IL-4)         | 0.0346   | student's t-test |

| Figure 3D                                  | p-Value  | Test             |
|--------------------------------------------|----------|------------------|
| Psmb5 (shPsmb5/shGFP)                      | 0.0005   | student's t-test |
| Il-1 $\beta$ (shPsmb5/shGFP)               | 0.001    | student's t-test |
| Il-6 (shPsmb5/shGFP)                       | 0.0296   | student's t-test |
| Figure 3E (Bip)                            | p-Value  | Test             |
| 3hours (IL-4+Carf./IL-4)                   | 0.0371   | student's t-test |
| 3hours (IL-4+Bort./IL-4)                   | 0.0032   | student's t-test |
| 3hours (IL-4+MG132/IL-4)                   | 0.0048   | student's t-test |
| 3hours (IL-4+MLN./IL-4)                    | 0.0291   | student's t-test |
| 6hours (IL-4+Carf./IL-4)                   | 0.0042   | student's t-test |
| 6hours (IL-4+Bort./IL-4)                   | 0.0042   | student's t-test |
| 6hours (IL-4+MG132/IL-4)                   | 0.0022   | student's t-test |
| 6hours (IL-4+MLN./IL-4)                    | 0.0045   | student's t-test |
| Figure 3E (Chop)                           | p-Value  | Test             |
| 3hours (IL-4+Carf./IL-4)                   | 0.0006   | student's t-test |
| 3hours (IL-4+Bort./IL-4)                   | 0.0002   | student's t-test |
| 3hours (IL-4+MG132/IL-4)                   | 0.0004   | student's t-test |
| 3hours (IL-4+MG132/IL-4)                   | 0.0097   | student's t-test |
| 6hours (IL-4+Carf./IL-4)                   | 0.0009   | student's t-test |
| 6hours (IL-4+Bort./IL-4)                   | 0.0053   | student's t-test |
| 6hours (IL-4+MG132/IL-4)                   | 0.0049   | student's t-test |
| 6hours (IL-4+MG132/IL-4)                   | 0.0031   | student's t-test |
| Figure 3E (Il-1b)                          | p-Value  | Test             |
| 3hours (IL-4+Carf./IL-4)                   | 0.0035   | student's t-test |
| 3hours (IL-4+Bort./IL-4)                   | 0.0054   | student's t-test |
| 3hours (IL-4+MG132/IL-4)                   | 0.0012   | student's t-test |
| 3hours (IL-4+MLN./IL-4)                    | 0.0063   | student's t-test |
| 6hours (IL-4+Carf./IL-4)                   | 0.0031   | student's t-test |
| 6hours (IL-4+Bort./IL-4)                   | 0.0028   | student's t-test |
| 6hours (IL-4+MG132/IL-4)                   | 0.0063   | student's t-test |
| 6hours (IL-4+MLN./IL-4)                    | 0.0041   | student's t-test |
| Figure 3F                                  | p-Value  | Test             |
| Il-1 $\beta$ (IL-4+TUN/IL-4)               | 0.0611   | student's t-test |
| Il-1 $\beta$ (IL-4+TG/IL-4)                | 0.0017   | student's t-test |
| Il-6 (IL-4+TUN/IL-4)                       | 0.0001   | student's t-test |
| Il-6 (IL-4+TG/IL-4)                        | 0.001    | student's t-test |
| Cd206 (IL-4+TUN/IL-4)                      | 0.0016   | student's t-test |
| Cd206 (IL-4+TG/IL-4)                       | 0.0009   | student's t-test |
| Arg1 (IL-4+TUN/IL-4)                       | 0.0335   | student's t-test |
| Arg1 (IL-4+TG/IL-4)                        | 0.0007   | student's t-test |
| Bip (IL-4+TUN/IL-4)                        | 0.0001   | student's t-test |
| Bip (IL-4+TG/IL-4)                         | 0.0056   | student's t-test |
| Chop (IL-4+TUN/IL-4)                       | 0.0004   | student's t-test |
| Chop (IL-4+TG/IL-4)                        | 0.0031   | student's t-test |
| Figure 3G                                  | p-Value  | Test             |
| Il-1 $\beta$ (IL-4+4-PBA+Carf./IL-4+Carf.) | 0.0028   | student's t-test |
| Il-1 $\beta$ (IL-4+4-PBA+Bort./IL-4+Bort.) | p<0.0001 | student's t-test |
| Il-1 $\beta$ (IL-4+4-PBA+MLN./IL-4+MLN.)   | 0.0001   | student's t-test |
| Il-1 $\beta$ (IL-4+4-PBA+MG132/IL-4+MG132) | p<0.0001 | student's t-test |
| Il-6 (IL-4+4-PBA+Carf./IL-4+Carf.)         | 0.0002   | student's t-test |
| Il-6 (IL-4+4-PBA+Bort./IL-4+Bort.)         | 0.0002   | student's t-test |
| Il-6 (IL-4+4-PBA+MLN./IL-4+MLN.)           | 0.0115   | student's t-test |
| Il-6 (IL-4+4-PBA+MG132/IL-4+MG132)         | 0.0023   | student's t-test |
| Inos (IL-4+4-PBA+Carf./IL-4+Carf.)         | 0.0013   | student's t-test |
| Inos (IL-4+4-PBA+Bort./IL-4+Bort.)         | 0.0007   | student's t-test |
| Inos (IL-4+4-PBA+MLN./IL-4+MLN.)           | 0.0046   | student's t-test |
| Inos (IL-4+4-PBA+MG132/IL-4+MG132)         | 0.0001   | student's t-test |

|                                            |         |                  |
|--------------------------------------------|---------|------------------|
| Figure 4A (Il-1 $\beta$ )                  | p-Value | Test             |
| IL-4+Carf. (Ern1 <sup>-/-</sup> /WT)       | 0.0002  | student's t-test |
| Figure 4A (Il-6)                           | p-Value | Test             |
| IL-4+Carf. (Ern1 <sup>-/-</sup> /WT)       | 0.005   | student's t-test |
| Figure 4B (Il-1 $\beta$ )                  | p-Value | Test             |
| IL-4+Carf. (Ern1 <sup>-/-</sup> /WT)       | 0.001   | student's t-test |
| Figure 4B (Il-6)                           | p-Value | Test             |
| IL-4+Carf. (Ern1 <sup>-/-</sup> /WT)       | 0.0001  | student's t-test |
| Figure 4C                                  | p-Value | Test             |
| Carf. (Kira6/control)                      | 0.0039  | student's t-test |
| Carf. (4 $\mu$ 8c/control)                 | 0.2158  | student's t-test |
| Figure 4E                                  | p-Value | Test             |
| Bip (IL-4+Kira6+Carf./IL-4+Carf.)          | 0.0178  | student's t-test |
| Chop (IL-4+Kira6+Carf./IL-4+Carf.)         | 0.0351  | student's t-test |
| Il-1 $\beta$ (IL-4+Kira6+Carf./IL-4+Carf.) | 0.005   | student's t-test |
| Il-6 (IL-4+Kira6+Carf./IL-4+Carf.)         | 0.0088  | student's t-test |
| Figure 4F                                  | p-Value | Test             |
| sXBP1 (IL-4+Carf./IL-4)                    | 0.1185  | student's t-test |
| sXBP1 (IL-4+TUN/IL-4)                      | 0.0019  | student's t-test |
| usXBP1 (IL-4+Carf./IL-4)                   | 0.1862  | student's t-test |
| usXBP1 (IL-4+TUN/IL-4)                     | 0.0059  | student's t-test |
| Figure 4G                                  | p-Value | Test             |
| sXBP1 (IL-4+Carf./IL-4)                    | 0.1564  | student's t-test |
| sXBP1 (IL-4+TUN/IL-4)                      | 0.0003  | student's t-test |
| usXBP1 (IL-4+Carf./IL-4)                   | 0.0615  | student's t-test |
| usXBP1 (IL-4+TUN/IL-4)                     | <0.0001 | student's t-test |
| Figure 4K                                  | p-Value | Test             |
| IL-4+Carf./IL-4                            | 0.0024  | student's t-test |

|                                 |         |                  |
|---------------------------------|---------|------------------|
| Figure 5B                       | p-Value | Test             |
| Vehicle (PreRx/PstRx)           | 0.0231  | student's t-test |
| Carf. (PreRx/PstRx)             | 0.0093  | student's t-test |
| Clod. (PreRx/PstRx)             | 0.2537  | student's t-test |
| Carf.+Clod. (PreRx/PstRx)       | 0.031   | student's t-test |
| Figure 5D                       | p-Value | Test             |
| Area (Vehicle/Carf.)            | 0.0005  | student's t-test |
| Area (Vehicle/Clod.)            | 0.0692  | student's t-test |
| Area (Vehicle/Carf.+Clod.)      | 0.011   | student's t-test |
| Nb. (Vehicle/Carf.)             | 0.0018  | student's t-test |
| Nb. (Vehicle/Clod.)             | 0.2939  | student's t-test |
| Nb. (Vehicle/Carf.+Clod.)       | 0.0308  | student's t-test |
| Figure 5F                       | p-Value | Test             |
| CD206 (Vehicle/Carf.)           | 0.0028  | student's t-test |
| CD80 (Vehicle/Carf.)            | 0.0084  | student's t-test |
| Figure 5H                       | p-Value | Test             |
| CD8 (Vehicle/Carf.)             | 0.0039  | student's t-test |
| CD69 (Vehicle/Carf.)            | 0.0012  | student's t-test |
| Figure 5J                       | p-Value | Test             |
| Vehicle (PreRx/PstRx)           | 0.0202  | student's t-test |
| DT (PreRx/PstRx)                | 0.0222  | student's t-test |
| Carf. (PreRx/PstRx)             | 0.0013  | student's t-test |
| Carf.+DT (PreRx/PstRx)          | 0.1129  | student's t-test |
| Figure 5L                       | p-Value | Test             |
| WT-Carf./WT-Vehicle             | <0.0001 | student's t-test |
| LyzM-cre-Carf./LyzM-cre-Vehicle | 0.0129  | student's t-test |

| Figure 6A                                            | p-Value | Test             |
|------------------------------------------------------|---------|------------------|
| WT-Veh./WT-Carf.                                     | <0.0001 | student's t-test |
| RAG1 <sup>-/-</sup> -Veh./RAG1 <sup>-/-</sup> -Carf. | 0.0141  | student's t-test |
| Figure 6C                                            | p-Value | Test             |
| WT-Veh./WT-Carf.                                     | <0.0001 | student's t-test |
| RAG1 <sup>-/-</sup> -Veh./RAG1 <sup>-/-</sup> -Carf. | 0.0104  | student's t-test |
| Figure 6I                                            | p-Value | Test             |
| CD69 (Vehile./PD1-Ab)                                | 0.029   | student's t-test |
| CD69 (Vehile./Carf.)                                 | 0.0296  | student's t-test |
| CD69 (Vehile./PD1-Ab +Carf.)                         | 0.0015  | student's t-test |
| CD25 (Vehile./PD1-Ab)                                | 0.0537  | student's t-test |
| CD25 (Vehile./Carf.)                                 | 0.0048  | student's t-test |
| CD25 (Vehile./PD1-Ab +Carf.)                         | 0.0013  | student's t-test |

| Figure 7A                      | p-Value | Test             |
|--------------------------------|---------|------------------|
| Il-1 $\beta$ (IL-4+Carf./IL-4) | 0.0007  | student's t-test |
| Il-1 $\beta$ (IL-4+Bort./IL-4) | 0.0143  | student's t-test |
| Il-1 $\beta$ (IL-4+MLN./IL-4)  | 0.6815  | student's t-test |
| IL-6 (IL-4+Carf./IL-4)         | 0.0001  | student's t-test |
| IL-6 (IL-4+Bort./IL-4)         | 0.0042  | student's t-test |
| IL-6 (IL-4+MLN./IL-4)          | 0.0045  | student's t-test |
| TNF-a (IL-4+Carf./IL-4)        | 0.0033  | student's t-test |
| TNF-a (IL-4+Bort./IL-4)        | 0.0087  | student's t-test |
| TNF-a (IL-4+MLN./IL-4)         | 0.0388  | student's t-test |
| IL-10 (IL-4+Carf./IL-4)        | 0.0003  | student's t-test |
| IL-10 (IL-4+Bort./IL-4)        | 0.0027  | student's t-test |
| IL-10 (IL-4+MLN./IL-4)         | 0.0002  | student's t-test |
| TGF-b (IL-4+Carf./IL-4)        | 0.0004  | student's t-test |
| TGF-b (IL-4+Bort./IL-4)        | 0.0028  | student's t-test |
| TGF-b (IL-4+MLN./IL-4)         | 0.6684  | student's t-test |
| Figure 7B                      | p-Value | Test             |
| Il-1 $\beta$ (IL-4+Carf./IL-4) | 0.0015  | student's t-test |
| Il-1 $\beta$ (IL-4+Bort./IL-4) | 0.0006  | student's t-test |
| Il-1 $\beta$ (IL-4+MLN./IL-4)  | 0.0039  | student's t-test |
| IL-6 (IL-4+Carf./IL-4)         | 0.0072  | student's t-test |
| IL-6 (IL-4+Bort./IL-4)         | 0.0019  | student's t-test |
| IL-6 (IL-4+MLN./IL-4)          | 0.0015  | student's t-test |
| TNF-a (IL-4+Carf./IL-4)        | 0.0249  | student's t-test |
| TNF-a (IL-4+Bort./IL-4)        | 0.035   | student's t-test |
| TNF-a (IL-4+MLN./IL-4)         | 0.0171  | student's t-test |
| Figure 7D                      | p-Value | Test             |
| IL-4+Carf./IL-4                | 0.0096  | student's t-test |
| IL-4+Bort./IL-4                | 0.0327  | student's t-test |
| IL-4+MLN./IL-4                 | 0.0254  | student's t-test |
| Figure 7F                      | p-Value | Test             |
| IL-4+Carf./IL-4                | 0.0062  | student's t-test |
| IL-4+Bort./IL-4                | 0.0148  | student's t-test |
| IL-4+MLN./IL-4                 | 0.0125  | student's t-test |
| Figure 7H                      | p-Value | Test             |
| IL-4+Carf./IL-4                | 0.0229  | student's t-test |
| IL-4+Bort./IL-4                | 0.0113  | student's t-test |
| IL-4+MLN./IL-4                 | 0.0491  | student's t-test |

| Figure EV1A               | p-Value | Test             |
|---------------------------|---------|------------------|
| M0+LPS 6h/M0              | 0.0003  | student's t-test |
| M0+LPS 12h/M0             | 0.0065  | student's t-test |
| M0+IL-4 6h/M0             | 0.3429  | student's t-test |
| M0+IL-4 12h/M0            | 0.0634  | student's t-test |
| Figure EV1B               | p-Value | Test             |
| Il-1 $\beta$ (LPS 6h/M0)  | 0.0002  | student's t-test |
| Il-1 $\beta$ (LPS 12h/M0) | 0.0008  | student's t-test |
| Il-6 (LPS 6h/M0)          | 0.0009  | student's t-test |
| Il-6 (LPS 12h/M0)         | <0.0001 | student's t-test |
| Il-6 (IL-4 6h/M0)         | 0.077   | student's t-test |
| Il-6 (IL-4 12h/M0)        | 0.0575  | student's t-test |
| Cd206 (IL-4 6h/M0)        | 0.0001  | student's t-test |
| Cd206 (IL-4 12h/M0)       | <0.0001 | student's t-test |
| Figure EV1C               | p-Value | Test             |
| 3h (IL-4+MLN./IL-4)       | 0.0001  | student's t-test |
| 3h (IL-4+Bort./IL-4)      | 0.0003  | student's t-test |
| 3h (IL-4+Carf./IL-4)      | 0.0003  | student's t-test |
| 6h (IL-4+MLN./IL-4)       | 0.0003  | student's t-test |
| 6h (IL-4+Bort./IL-4)      | 0.0007  | student's t-test |
| 6h (IL-4+Carf./IL-4)      | 0.0007  | student's t-test |

| Figure EV2A                    | p-Value  | Test             |
|--------------------------------|----------|------------------|
| Il-6 (IL-4+Bort./IL-4)         | 0.0001   | student's t-test |
| Il-6 (IL-4+MLN./IL-4)          | 0.0004   | student's t-test |
| Inos (IL-4+Bort./IL-4)         | 0.0017   | student's t-test |
| Inos (IL-4+MLN./IL-4)          | 0.0033   | student's t-test |
| Cd206 (IL-4+Bort./IL-4)        | 0.0066   | student's t-test |
| Cd206 (IL-4+MLN./IL-4)         | 0.0002   | student's t-test |
| Arg1 (IL-4+Bort./IL-4)         | 0.0036   | student's t-test |
| Arg1 (IL-4+MLN./IL-4)          | 0.0324   | student's t-test |
| Figure EV2B                    | p-Value  | Test             |
| Il-6 (IL-4+Carf./IL-4)         | 0.0004   | student's t-test |
| Il-6 (IL-4+Bort./IL-4)         | p<0.0001 | student's t-test |
| Il-6 (IL-4+MLN./IL-4)          | 0.0001   | student's t-test |
| Inos (IL-4+Carf./IL-4)         | 0.0033   | student's t-test |
| Inos (IL-4+Bort./IL-4)         | 0.0064   | student's t-test |
| Inos (IL-4+MLN./IL-4)          | 0.0014   | student's t-test |
| Cd206 (IL-4+Carf./IL-4)        | 0.0001   | student's t-test |
| Cd206 (IL-4+Bort./IL-4)        | 0.0019   | student's t-test |
| Cd206 (IL-4+MLN./IL-4)         | 0.0004   | student's t-test |
| Arg1 (IL-4+Carf./IL-4)         | 0.0001   | student's t-test |
| Arg1 (IL-4+Bort./IL-4)         | 0.0029   | student's t-test |
| Arg1 (IL-4+MLN./IL-4)          | 0.0044   | student's t-test |
| Figure EV2C                    | p-Value  | Test             |
| IL-6 (IL-4+Bort./IL-4)         | 0.0002   | student's t-test |
| IL-6 (IL-4+MLN./IL-4)          | 0.0006   | student's t-test |
| TNF $\alpha$ (IL-4+Bort./IL-4) | 0.0211   | student's t-test |
| TNF $\alpha$ (IL-4+MLN./IL-4)  | 0.0482   | student's t-test |
| Figure EV2D                    | p-Value  | Test             |
| IL-6 (IL-4+Carf./IL-4)         | p<0.0001 | student's t-test |
| IL-6 (IL-4+Bort./IL-4)         | 0.0003   | student's t-test |
| IL-6 (IL-4+MLN./IL-4)          | 0.0005   | student's t-test |

| Figure EV2E                        | p-Value  | Test             |
|------------------------------------|----------|------------------|
| BMDM-Il-1 $\beta$ (Carf./Mock)     | 0.0004   | student's t-test |
| BMDM-Il-6 (Carf./Mock)             | <0.0001  | student's t-test |
| BMDM-Inos (Carf./Mock)             | 0.0009   | student's t-test |
| Raw264.7-Il-1 $\beta$ (Carf./Mock) | 0.0009   | student's t-test |
| Raw264.7-Il-6 (Carf./Mock)         | <0.0001  | student's t-test |
| Raw264.7-Inos (Carf./Mock)         | 0.0005   | student's t-test |
| Figure EV2H                        | p-Value  | Test             |
| CD86 (IL-4+Bort./IL-4)             | 0.0448   | student's t-test |
| CD86 (IL-4+MLN./IL-4)              | 0.0206   | student's t-test |
| CD206 (IL-4+Bort./IL-4)            | 0.0027   | student's t-test |
| CD206 (IL-4+MLN./IL-4)             | 0.0023   | student's t-test |
| Figure EV2J                        | p-Value  | Test             |
| CD86 (IL-4+Carf./IL-4)             | 0.0003   | student's t-test |
| CD86 (IL-4+Bort./IL-4)             | 0.0005   | student's t-test |
| CD86 (IL-4+MLN./IL-4)              | 0.0011   | student's t-test |
| CD206 (IL-4+Carf./IL-4)            | 0.0013   | student's t-test |
| CD206 (IL-4+Bort./IL-4)            | 0.002    | student's t-test |
| CD206 (IL-4+MLN./IL-4)             | 0.0213   | student's t-test |
| Figure EV2L                        | p-Value  | Test             |
| IL-4+Bort./IL-4                    | 0.0065   | student's t-test |
| IL-4+MLN./IL-4                     | 0.0113   | student's t-test |
| EV2N                               | p-Value  | Test             |
| IL-4+Carf./IL-4                    | 0.0641   | student's t-test |
| Figure EV2P                        | p-Value  | Test             |
| IL-4+Carf./IL-4                    | 0.0176   | student's t-test |
| IL-4+Bort./IL-4                    | 0.0205   | student's t-test |
| IL-4+MLN./IL-4                     | 0.0655   | student's t-test |
| Figure EV2R                        | p-Value  | Test             |
| CD8 (Carf./DMSO)                   | 0.5231   | student's t-test |
| CD4 (Carf./DMSO)                   | 0.0606   | student's t-test |
| Figure EV2S                        | p-Value  | Test             |
| Arg-1 (Sup.+Carf./Sup)             | 0.0023   | student's t-test |
| Cd206 (Sup.+Carf./Sup)             | 0.0181   | student's t-test |
| Tgfb (Sup.+Carf./Sup)              | 0.0276   | student's t-test |
| Figure EV2T                        | p-Value  | Test             |
| Il-1 $\beta$ (Sup.+Carf./Sup)      | p<0.0001 | student's t-test |
| Il-6 (Sup.+Carf./Sup)              | 0.0002   | student's t-test |
| Inos (Sup.+Carf./Sup)              | 0.0008   | student's t-test |
| Figure EV2U                        | p-Value  | Test             |
| Arg-1 (Sup.+Carf./Sup)             | 0.0147   | student's t-test |
| Cd206 (Sup.+Carf./Sup)             | 0.038    | student's t-test |
| Tgfb (Sup.+Carf./Sup)              | 0.0111   | student's t-test |

| Figure EV3A                          | p-Value | Test             |
|--------------------------------------|---------|------------------|
| Atf6 (shAtf6/shGFP)                  | 0.0032  | student's t-test |
| Perk (shPerk/shGFP)                  | 0.0022  | student's t-test |
| Figure EV3D (Il-1 $\beta$ )          | p-Value | Test             |
| IL-4+Bort. (Ern1 <sup>-/-</sup> /WT) | 0.021   | student's t-test |
| IL-4+MLN. (Ern1 <sup>-/-</sup> /WT)  | 0.0038  | student's t-test |
| Figure EV3D (Il-6)                   | p-Value | Test             |
| IL-4+Bort. (Ern1 <sup>-/-</sup> /WT) | 0.0008  | student's t-test |
| IL-4+MLN. (Ern1 <sup>-/-</sup> /WT)  | 0.0075  | student's t-test |
| Figure EV3E (Il-1 $\beta$ )          | p-Value | Test             |
| IL-4+Bort. (Ern1 <sup>-/-</sup> /WT) | 0.0018  | student's t-test |
| IL-4+MLN. (Ern1 <sup>-/-</sup> /WT)  | 0.002   | student's t-test |
| Figure EV3E (Il-6)                   | p-Value | Test             |

|                                                 |         |                  |
|-------------------------------------------------|---------|------------------|
| IL-4+Bort. (Ern1 <sup>-/-</sup> /WT)            | 0.0002  | student's t-test |
| IL-4+MLN. (Ern1 <sup>-/-</sup> /WT)             | 0.0105  | student's t-test |
| EV3F (Il-1 $\beta$ )                            | p-Value | Test             |
| IL-4+Carf. (shAtf6/shGFP)                       | 0.6053  | student's t-test |
| Figure EV3F (Il-6)                              | p-Value | Test             |
| IL-4+Carf. (shAtf6/shGFP)                       | 0.5354  | student's t-test |
| Figure EV3G (Il-1 $\beta$ )                     | p-Value | Test             |
| IL-4+Carf. (shPerk/shGFP)                       | 0.9298  | student's t-test |
| Figure EV3G (Il-6)                              | p-Value | Test             |
| IL-4+Carf. (shPerk/shGFP)                       | 0.9307  | student's t-test |
| Figure EV3H                                     | p-Value | Test             |
| Il-1 $\beta$ (IL-4+Kira6+Carf./IL-4+Carf.)      | 0.0042  | student's t-test |
| Il-1 $\beta$ (IL-4+4 $\mu$ 8c+Carf./IL-4+Carf.) | 0.3663  | student's t-test |
| Il-6 (IL-4+Kira6+Carf./IL-4+Carf.)              | 0.0007  | student's t-test |
| Il-6 (IL-4+4 $\mu$ 8c+Carf./IL-4+Carf.)         | 0.4165  | student's t-test |
| Figure EV3I                                     | p-Value | Test             |
| Bip (IL-4+Kira6+Carf./IL-4+Carf.)               | 0.0034  | student's t-test |
| Chop (IL-4+Kira6+Carf./IL-4+Carf.)              | 0.0029  | student's t-test |
| Il-1 $\beta$ (IL-4+Kira6+Carf./IL-4+Carf.)      | 0.0028  | student's t-test |
| Il-6 (IL-4+Kira6+Carf./IL-4+Carf.)              | 0.0232  | student's t-test |

|                       |         |                  |
|-----------------------|---------|------------------|
| Figure EV4B           | p-Value | Test             |
| Vehicle/Clod.         | 0.0001  | student's t-test |
| Figure EV4C           | p-Value | Test             |
| Vehicle/Carf.         | 0.0871  | student's t-test |
| Figure EV4D           | p-Value | Test             |
| Carf./Vehicle         | 0.8698  | student's t-test |
| Figure EV4E           | p-Value | Test             |
| DT/Vehicle            | 0.0046  | student's t-test |
| Figure EV4F           | p-Value | Test             |
| Clod./Vehicle         | 0.0093  | student's t-test |
| Figure EV4I           | p-Value | Test             |
| Vehicle/Carf.         | <0.0001 | student's t-test |
| Vehicle/Carf.+Clod    | 0.0105  | student's t-test |
| Figure EV4K           | p-Value | Test             |
| Cd206 (Vehicle/Carf.) | 0.0013  | student's t-test |
| Cd80 (Vehicle/Carf.)  | 0.0043  | student's t-test |
| Cd86 (Vehicle/Carf.)  | 0.0029  | student's t-test |
| Figure EV4M           | p-Value | Test             |
| Vehicle/Clod.         | 0.0088  | student's t-test |

|                       |         |                  |
|-----------------------|---------|------------------|
| Figure EV5E           | p-Value | Test             |
| Control/CD4-Ab        | <0.0001 | student's t-test |
| Figure EV5F           | p-Value | Test             |
| Vehicle (PreRx/PstRx) | 0.0005  | student's t-test |
| Carf. (PreRx/PstRx)   | 0.0012  | student's t-test |
| CD4-Ab (PreRx/PstRx)  | 0.0136  | student's t-test |
| CD8-Ab (PreRx/PstRx)  | 0.0149  | student's t-test |
| Figure EV5G           | p-Value | Test             |
| Area (Vehile./Carf.)  | 0.0034  | student's t-test |
| Area (Vehile./CD4-Ab) | 0.0207  | student's t-test |
| Area (Vehile./CD8-Ab) | 0.0249  | student's t-test |
| Nb. (Vehile./Carf.)   | 0.0009  | student's t-test |
| Nb. (Vehile./CD4-Ab)  | 0.0245  | student's t-test |
| Nb. (Vehile./CD8-Ab)  | 0.0124  | student's t-test |



|                                     |         |                  |
|-------------------------------------|---------|------------------|
| Figure EV5H                         | p-Value | Test             |
| Vehicle (PreRx/PstRx)               | 0.0314  | student's t-test |
| PD1-Ab (PreRx/PstRx)                | 0.1996  | student's t-test |
| Carf. (PreRx/PstRx)                 | 0.001   | student's t-test |
| Carf.+PD1-Ab (PreRx/PstRx)          | <0.0001 | student's t-test |
| Figure EV5I                         | p-Value | Test             |
| Area (Vehile./PD1-Ab)               | 0.1055  | student's t-test |
| Area (Vehile./Carf.)                | 0.002   | student's t-test |
| Area (Vehile./Carf.+PD1-Ab)         | 0.0003  | student's t-test |
| Nb. (Vehile./PD1-Ab)                | 0.1795  | student's t-test |
| Nb. (Vehile./Carf.)                 | 0.0023  | student's t-test |
| Nb. (Vehile./Carf.+PD1-Ab)          | 0.0006  | student's t-test |
|                                     |         |                  |
| Appendix Figure S1A                 | p-Value | Test             |
| Psm5 (shPsm5/shGFP)                 | 0.0014  | student's t-test |
| Cd206 (shPsm5/shGFP)                | 0.001   | student's t-test |
| Arg-1 (shPsm5/shGFP)                | 0.0003  | student's t-test |
| Appendix Figure S1B (Bip)           | p-Value | Test             |
| 3hours (IL-4+Carf./IL-4)            | <0.0001 | student's t-test |
| 3hours (IL-4+Bort./IL-4)            | 0.0011  | student's t-test |
| 3hours (IL-4+MG132/IL-4)            | 0.0008  | student's t-test |
| 3hours (IL-4+MLN./IL-4)             | 0.0005  | student's t-test |
| 6hours (IL-4+Carf./IL-4)            | <0.0001 | student's t-test |
| 6hours (IL-4+Bort./IL-4)            | 0.0001  | student's t-test |
| 6hours (IL-4+MG132/IL-4)            | 0.0004  | student's t-test |
| 6hours (IL-4+MLN./IL-4)             | <0.0001 | student's t-test |
| Appendix Figure S1B (Chop)          | p-Value | Test             |
| 3hours (IL-4+Carf./IL-4)            | <0.0001 | student's t-test |
| 3hours (IL-4+Bort./IL-4)            | <0.0001 | student's t-test |
| 3hours (IL-4+MG132/IL-4)            | <0.0001 | student's t-test |
| 3hours (IL-4+MLN./IL-4)             | <0.0001 | student's t-test |
| 6hours (IL-4+Carf./IL-4)            | 0.0001  | student's t-test |
| 6hours (IL-4+Bort./IL-4)            | 0.0035  | student's t-test |
| 6hours (IL-4+MG132/IL-4)            | 0.0007  | student's t-test |
| 6hours (IL-4+MLN./IL-4)             | 0.001   | student's t-test |
| Appendix Figure S1B (Il-1 $\beta$ ) | p-Value | Test             |
| 3hours (IL-4+Carf./IL-4)            | 0.0004  | student's t-test |
| 3hours (IL-4+Bort./IL-4)            | 0.0003  | student's t-test |
| 3hours (IL-4+MG132/IL-4)            | 0.0005  | student's t-test |
| 3hours (IL-4+MLN./IL-4)             | 0.0004  | student's t-test |
| 6hours (IL-4+Carf./IL-4)            | <0.0001 | student's t-test |
| 6hours (IL-4+Bort./IL-4)            | 0.0001  | student's t-test |
| 6hours (IL-4+MG132/IL-4)            | 0.0014  | student's t-test |
| 6hours (IL-4+MLN./IL-4)             | 0.0252  | student's t-test |
| Appendix Figure S1C                 | p-Value | Test             |
| Bip (IL-4+TUN/IL-4)                 | 0.0003  | student's t-test |
| Bip (IL-4+TG/IL-4)                  | 0.0006  | student's t-test |
| Chop (IL-4+TUN/IL-4)                | 0.0004  | student's t-test |
| Chop (IL-4+TG/IL-4)                 | 0.0002  | student's t-test |
| Il-1 $\beta$ (IL-4+TUN/IL-4)        | 0.0174  | student's t-test |
| Il-1 $\beta$ (IL-4+TG/IL-4)         | 0.0918  | student's t-test |
| Il-6 (IL-4+TUN/IL-4)                | 0.0005  | student's t-test |
| Il-6 (IL-4+TG/IL-4)                 | 0.0005  | student's t-test |
| Cd206 (IL-4+TUN/IL-4)               | 0.0204  | student's t-test |
| Cd206 (IL-4+TG/IL-4)                | 0.0003  | student's t-test |
| Arg1 (IL-4+TUN/IL-4)                | 0.0005  | student's t-test |
| Arg1 (IL-4+TG/IL-4)                 | <0.0001 | student's t-test |
